# Supplementary material for: Impact of the Kuroshio intrusion on the nutrient inventory in the upper northern South China Sea: insights from an isopycnal mixing model
Source: Copernicus journal article supplement (doi:10.5194/bg-10-6419-2013), 2013-10-10
Supplement: Supplementary file 1 [file bg-10-6419-2013-supplement.pdf]

Supplementary Materials for:

**Impact of the Kuroshio intrusion on the nutrient  
inventory in the upper northern South China Sea:  
Insights from an isopycnal mixing model**

**Chuanjun Du<sup>1</sup>, Zhiyu Liu<sup>1</sup>, Minhan Dai<sup>1\*</sup>, Shuh-Ji Kao<sup>1</sup>, Zhimian Cao<sup>1</sup>,  
Yong Zhang<sup>2</sup>, Tao Huang<sup>1</sup>, Lifang Wang<sup>1</sup>, Yan Li<sup>1</sup>**

[1]{State Key Laboratory of Marine Environmental Science, Xiamen University,  
Xiamen 361005, China}

[2]{Key Laboratory of Coastal Zone Environmental Processes, Yantai Institute of  
Coastal Zone Research, Chinese Academy of Sciences, Yantai 264003, China}

Correspondence to: M. Dai (mdai@xmu.edu.cn)

## 1 Endmember sensitivity analysis

In order to quantify the error associated with different endmember values, two South China Sea (SCS) endmembers (SCS1 with data collected from SEATS and its nearby stations in summer and SCS2 with data collected from SEATS and its nearby stations in winter) and three Kuroshio endmembers (S4 with data collected from stations near the Luzon Strait in winter, Kuroshio with data collected from LU6 section in spring and western North Pacific (wNP) with data collected from The World Ocean Circulation Experiment (WOCE) data centre, Pacific PR20 section) were selected to create four endmember combinations (SCS1-S4, SCS1-Kuroshio, SCS1-wNP and SCS2-Kuroshio; Fig. S1A). These combinations were applied to calculate the  $R_K$  and  $N_m$  of the same water parcels in the central northern SCS (NSCS). As shown in Fig. S1B, differences in  $N_m$  for N+N ranging from 0-1  $\mu\text{mol L}^{-1}$  among various endmember combinations were observed in the upper 100 m. By fixing the “SCS1” as the SCS endmember, the average uncertainties for  $N_m$  induced by changing Kuroshio endmembers were  $-0.22 \pm 0.38$ ,  $-0.002 \pm 0.030$  and  $-0.28 \pm 0.59 \mu\text{mol L}^{-1}$  for N+N, SRP and  $\text{Si}(\text{OH})_4$ , respectively. In contrast, given the fixed Kuroshio endmember, the uncertainties for the  $N_m$  estimation induced by changing SCS endmembers were  $-0.09 \pm 0.28$ ,  $0.026 \pm 0.015$  and  $0.48 \pm 0.30 \mu\text{mol L}^{-1}$  for N+N, SRP and  $\text{Si}(\text{OH})_4$ , respectively. By judging the endmember representation and the locations of the endmember, the SCS1-Kuroshio combination was selected for our model calculation.

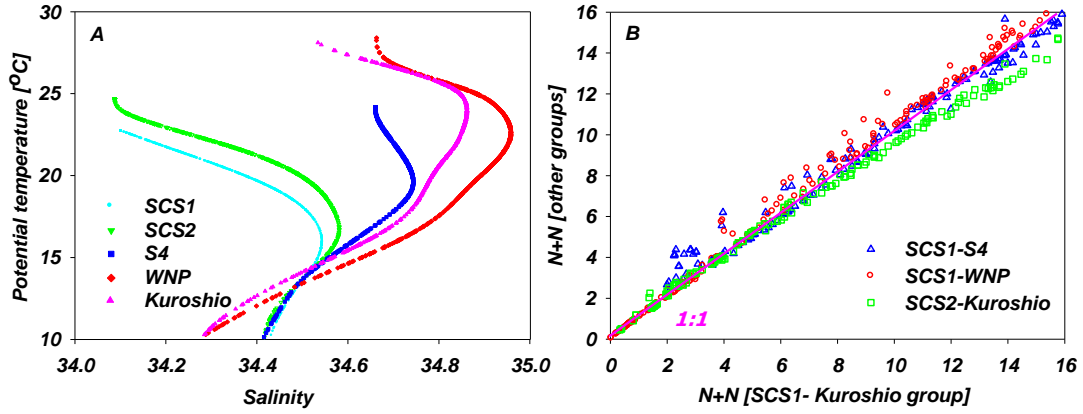

Figure S1. (A) Potential temperature versus salinity of the selected SCS and Kuroshio endmembers for  $N_m$  sensitivity analysis; (B) Isopycnal mixing model predicted N+N (nitrate plus nitrite) concentrations resulting from various combinations of endmember values versus those derived from using “SCS1” and “Kuroshio” as the endmembers. The N+N concentration data of the wNP endmember were collected at the Pacific PR20 section in October 1990 and June 1991 (WOCE (The World Ocean Circulation Experiment) Data Centre, <http://cchdo.ucsd.edu/>).

## 2 Error propagation for model-predicted nutrients

Considering all of the errors sources in our model prediction, the final error associated with the isopycnal approximation for nutrients ( $N_m$ ) can be estimated according to:

$$X_N = (N_K - N_S) \times X_{RK} + R_K \times X_{NK} + (1 - R_K) \times X_{NS} \quad (S1)$$

$$S_N = \sqrt{(N_K - N_S)^2 \times (S_{RK})^2 + (R_K \times S_{NK})^2 + ((1 - R_K) \times S_{NS})^2} \quad (S2)$$

Here,  $X_N$  denotes the system error after the error propagation for  $N_m$ , and  $S_N$  denotes the random error which results from the propagation of errors' standard deviation for  $N_m$ . The final error for  $N_m$  can thus be illustrated as  $X_N \pm S_N$ .  $X_{RK}$  and  $S_{RK}$  denote the system and random errors of the Kuroshio water fraction ( $R_K$ ) evaluated from the  $\text{Ca}^{2+}$

data (see main text for details).  $X_{NK}$  and  $S_{NK}$  indicate the system and random errors of the endmember nutrient concentrations in the Kuroshio water, while  $X_{NS}$  and the  $S_{NS}$  represent those in the SCS proper water. As shown in Fig. S2, both  $X_N$  and  $S_N$  generally increased with increasing potential density but behaved differently with the  $R_K$ : the larger  $R_K$  usually showed less system error but tended to show larger random error. In the upper 100 m of the central NSCS, the final errors associated with the isopycnal mixing model were on average  $-0.16 \pm 0.65 \mu\text{mol L}^{-1}$  for N+N,  $0.1 \pm 0.73 \mu\text{mol L}^{-1}$  for  $\text{Si}(\text{OH})_4$  and  $-0.002 \pm 0.043 \mu\text{mol L}^{-1}$  for SRP (Fig. S2).

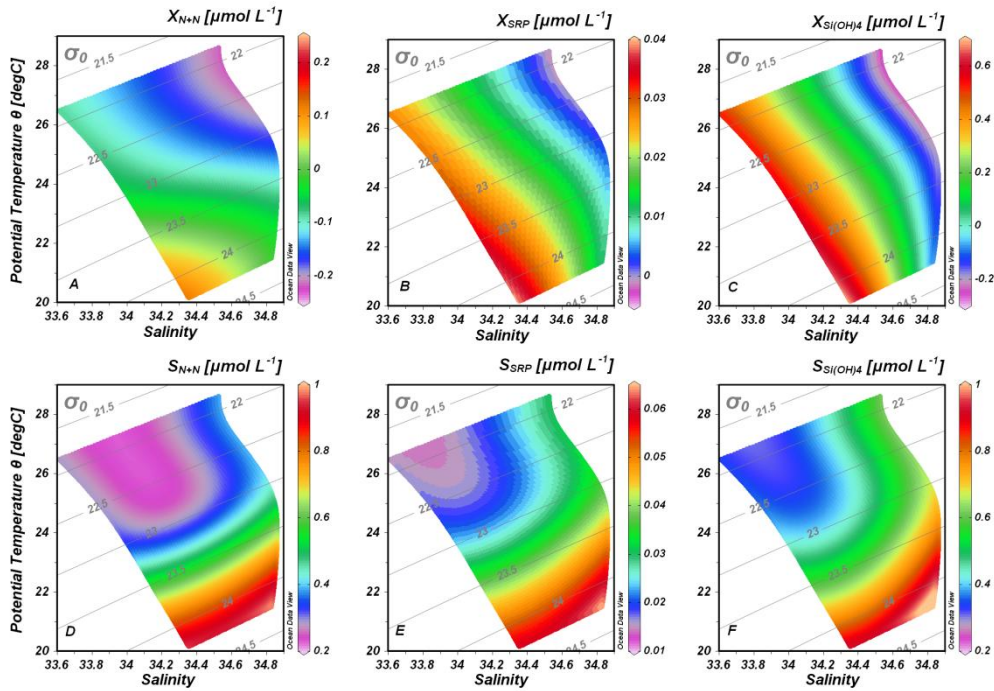

Figure S2. The system errors of the model prediction for (A) N+N (nitrate plus nitrite),  $X_{N+N}$ , (B) SRP (soluble reactive phosphate),  $X_{SRP}$  and (C)  $\text{Si}(\text{OH})_4$  (silicic acid),  $X_{\text{Si}(\text{OH})_4}$  in the upper 100 m of the central NSCS. Also shown are the corresponding random errors for (D) N+N,  $S_{N+N}$ , (E) SRP,  $S_{SRP}$  and (F)  $\text{Si}(\text{OH})_4$ ,  $S_{\text{Si}(\text{OH})_4}$ .
